# Supplementary material for: Scoring and ranking probabilistic seismic hazard models: an application based on macroseismic intensity data
Source: Copernicus journal article supplement (doi:10.5194/nhess-24-1401-2024), 2024-04-24
Supplement: Supplementary file 1 [file nhess-24-1401-2024-supplement.pdf]

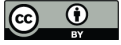

*Supplement of*

## **Scoring and ranking probabilistic seismic hazard models: an application based on macroseismic intensity data**

**Vera D'Amico et al.**

*Correspondence to:* Vera D'Amico ([vera.damico@ingv.it](mailto:vera.damico@ingv.it))

The copyright of individual parts of the supplement might differ from the article licence.

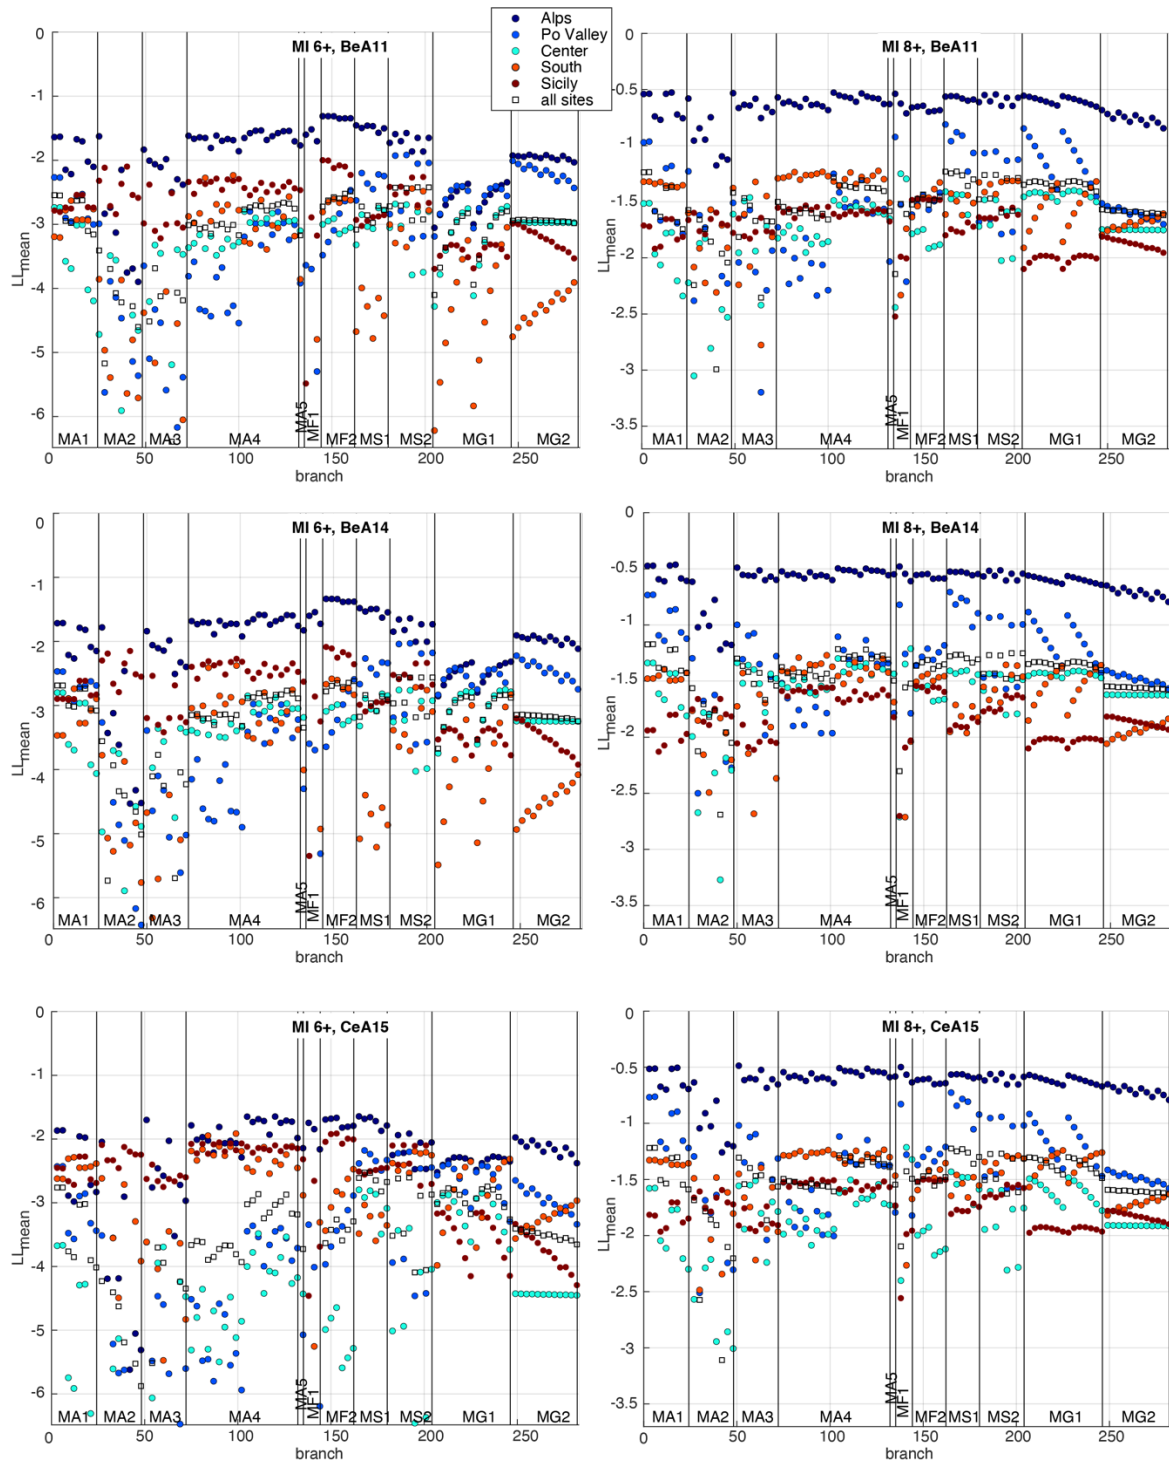

**Figure S1.** Values of  $LL_{\text{mean}}$  for each considered branch of MPS19 for the localities in five macro-areas and all the sites, for SA 0.2 s, MI6+ (left) and MI8+ (right), and each GMM (BeA11: Bindi et al., 2011; BeA14: Bindi et al., 2014; CeA15: Cauzzi et al., 2015). The branches are represented in abscissa from left to right and are grouped according to the 11 seismicity models.

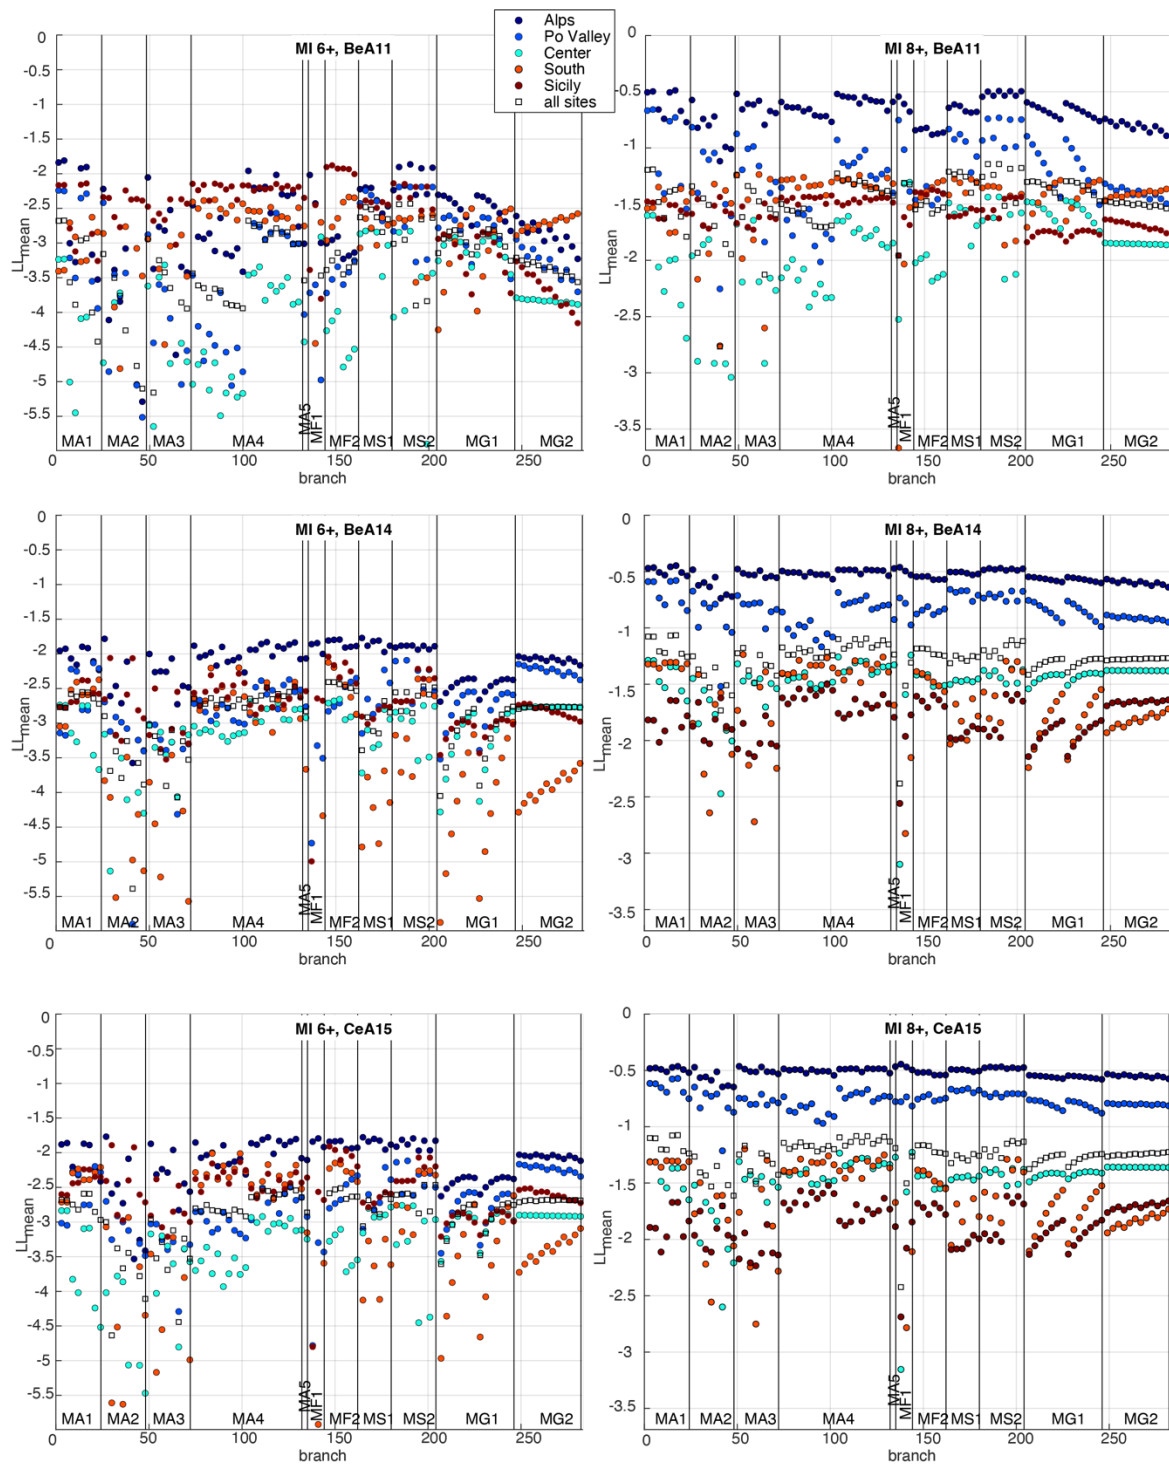

**Figure S2.** Values of  $LL_{\text{mean}}$  for each considered branch of MPS19 for the localities in five macro-areas and all the sites, for SA 1 s, MI6+ (left) and MI8+ (right), and each adopted GMM. The branches are represented in abscissa from left to right and are grouped according to the 11 seismicity models.

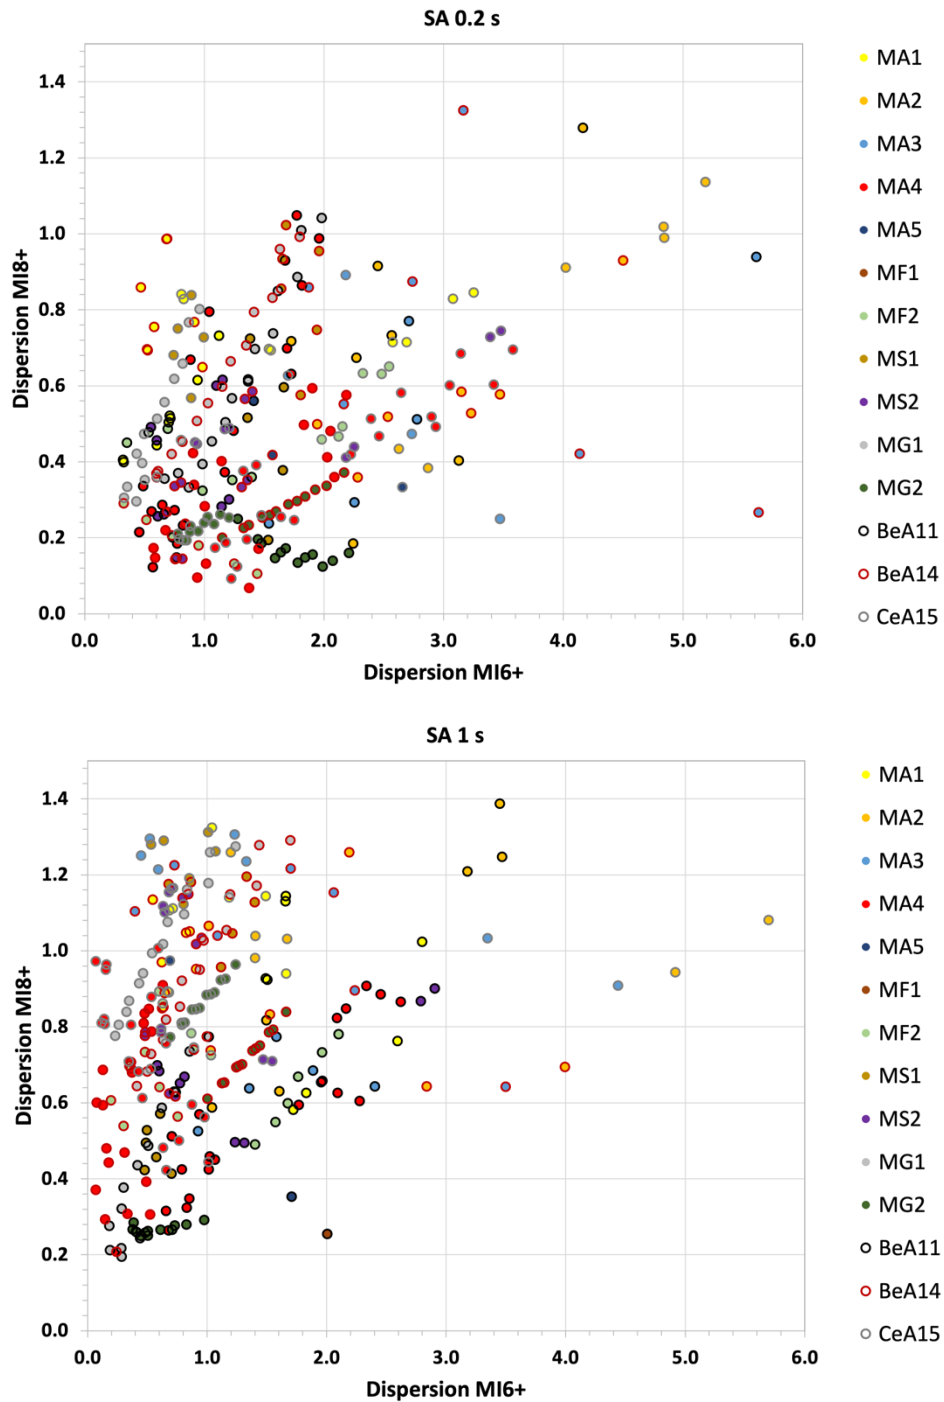

**Figure S3.** Dispersion of the  $LL_{\text{mean}}$  values among the four more representative macro-areas for each branch, for SA 0.2 s (top) and SA 1 s (bottom), MI6+ and MI8+. The color of the dots indicates the seismicity model, while the color of the borders indicates the GMM used in that branch.

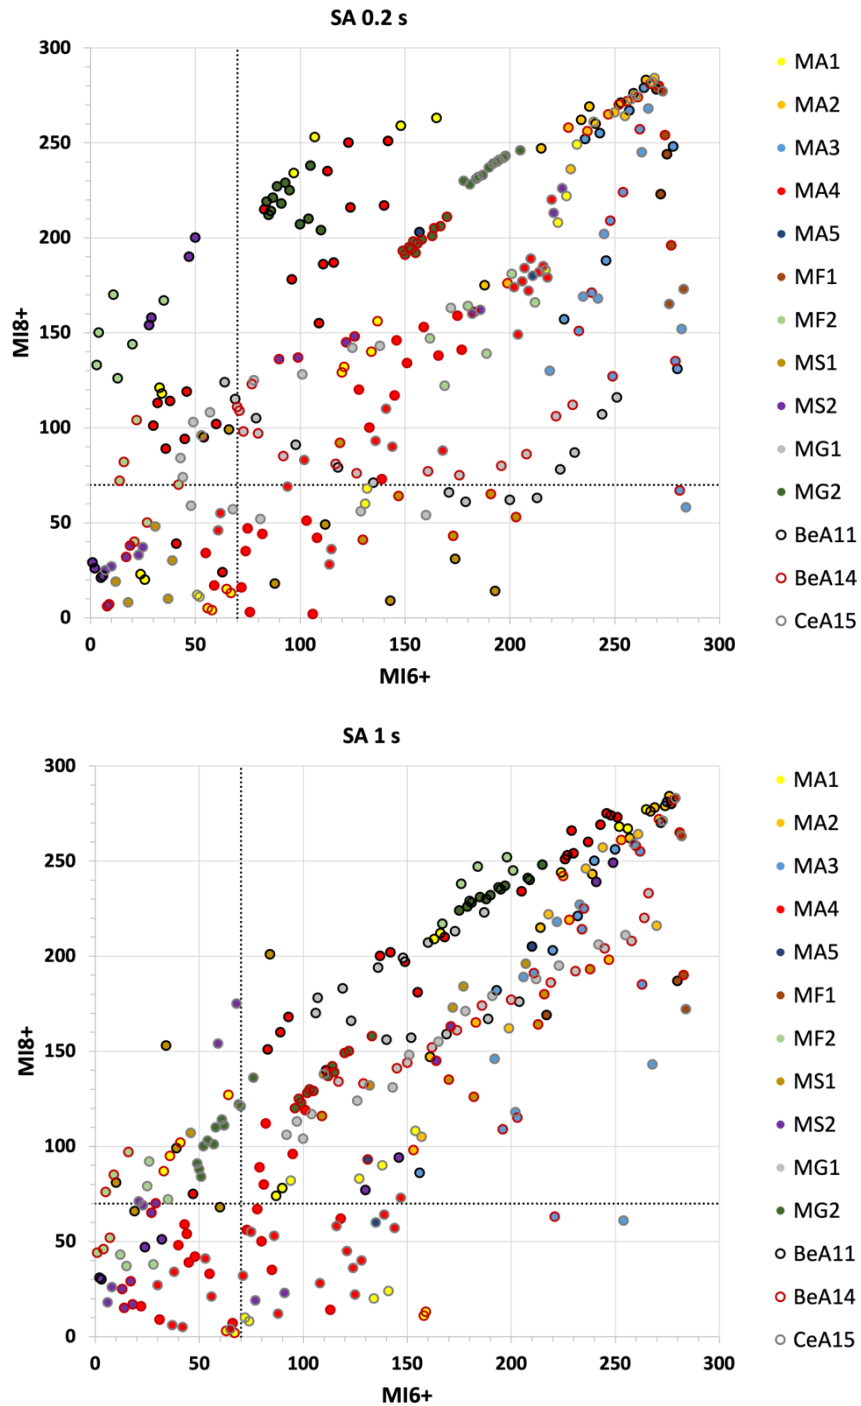

**Figure S4.** Comparison between the ranking of the branches for SA 0.2 s (top) and SA 1 s (bottom), based on the  $LL_{\text{mean}}$  values for MI6+ and MI8+. The color of the dots indicates the seismicity model, while the color of the borders indicates the GMM used in that branch. The dotted black lines identify the 70th position in both rankings.
